# Supplementary material for: Perspectives of clinicians and survivors on the continuity of service provision during rehabilitation after acquired brain injury
Source: PubMed Central journal article supplement (PMC10096466; doi:10.1371/journal.pone.0284375), 2023-04-12
Supplement: pone.0284375.s002.pdf [file pone.0284375.s002.pdf]

**S2 Table. Thematic content analysis based on the coding rating (the frequency of each code within each theme among all participants)**

| Codes                                                         | All participants<br>(n=28)<br>n (%) | Clinicians<br>(n=17)<br>n (%) | Patients<br>(n=10)<br>n (%) |
|---------------------------------------------------------------|-------------------------------------|-------------------------------|-----------------------------|
| <b>Theme 1: Enabling continuity of care</b>                   |                                     |                               |                             |
| <b>1.1. Experiences with acute rehabilitation care</b>        |                                     |                               |                             |
| • Quality of services                                         | 7 (25%)                             | 2 (12%)                       | 4 (40%)                     |
| • Individualized focus                                        | 6 (21%)                             |                               | 5 (50%)                     |
| • Specialized Services                                        | 6 (21%)                             |                               | 6 (60%)                     |
| • Accessibility to healthcare services                        | 3 (11%)                             |                               | 2 (20%)                     |
| • Deficits                                                    | 3 (11%)                             |                               | 3 (30%)                     |
| • Beside manner                                               | 3 (11%)                             |                               | 3 (30%)                     |
| • Education services to patients                              | 2 (7%)                              | 2 (12%)                       |                             |
| • Language barrier                                            | 1 (3%)                              |                               |                             |
| <b>1.2. Transition from acute to rehabilitation settings</b>  |                                     |                               |                             |
| • Service Pathways                                            | 15 (53%)                            | 15 (88%)                      |                             |
| • Discharge factors                                           | 9 (32%)                             | 9 (53%)                       |                             |
| • Accessibility to healthcare services                        | 7 (25%)                             |                               | 6 (60%)                     |
| • Deficits                                                    | 6 (21%)                             | 6 (35%)                       |                             |
| • Wait times                                                  | 5 (18%)                             | 1 (6%)                        | 3 (30%)                     |
| • Workflow design                                             | 4 (14%)                             | 4 (23%)                       |                             |
| • Specialized services                                        | 4 (14%)                             |                               | 3 (30%)                     |
| • Electronic health records                                   | 3 (11%)                             | 3 (17%)                       |                             |
| • Uncertainty                                                 | 2 (7%)                              | 2 (12%)                       |                             |
| • Quality of services                                         | 2 (7%)                              |                               | 1 (10%)                     |
| • Young patients with impairments                             | 1 (3%)                              | 1 (6%)                        |                             |
| • Education services to providers                             | 1 (3%)                              | 1 (6%)                        |                             |
| • Caregiver support services                                  | 1 (3%)                              |                               |                             |
| • Information services                                        | 1 (3%)                              |                               |                             |
| • Family Support                                              | 1 (3%)                              | 1 (6%)                        |                             |
| <b>1.3. Access to rehabilitation in the community setting</b> |                                     |                               |                             |
| • Specialized services                                        | 4 (14%)                             | 3 (17%)                       | 1 (10%)                     |
| • Deficits                                                    | 3 (11%)                             | 3 (17%)                       |                             |
| • Discharge factors                                           | 3 (11%)                             | 3 (17%)                       |                             |
| • Accessibility to healthcare services                        | 3 (11%)                             | 2 (12%)                       | 1 (10%)                     |
| • Resources                                                   | 2 (7%)                              | 2 (12%)                       |                             |
| <b>1.4. Re-integration into the community</b>                 |                                     |                               |                             |
| • Re-integration                                              | 10 (36%)                            | 4 (23%)                       | 6 (60%)                     |
| • Education services to patients                              | 3 (11%)                             |                               | 3 (30%)                     |
| • Individualized focus                                        | 3 (11%)                             |                               | 3 (30%)                     |
| • Support services                                            | 3 (11%)                             | 3 (17%)                       |                             |
| • Safety                                                      | 3 (11%)                             | 3 (17%)                       |                             |
| • Specialized services                                        | 3 (11%)                             |                               | 3 (30%)                     |
| • Deficits                                                    | 1 (3%)                              | 1 (6%)                        |                             |
| <b>1.5. Follow-up in the community</b>                        |                                     |                               |                             |
| • Follow-up                                                   | 15 (53%)                            | 15 (88%)                      |                             |

| <b>Codes</b>                                              | <b>All participants<br/>(n=28)<br/>n (%)</b> | <b>Clinicians<br/>(n=17)<br/>n (%)</b> | <b>Patients<br/>(n=10)<br/>n (%)</b> |
|-----------------------------------------------------------|----------------------------------------------|----------------------------------------|--------------------------------------|
| • Technology/Tele-health                                  | 12 (42%)                                     | 12 (70%)                               |                                      |
| • Safety                                                  | 8 (28%)                                      | 8 (47%)                                |                                      |
| • Support services                                        | 6 (21%)                                      | 6 (35%)                                |                                      |
| • Deficits                                                | 3 (11%)                                      | 3 (17%)                                |                                      |
| • Resources                                               | 2 (7%)                                       | 2 (12%)                                |                                      |
| • Survey                                                  | 1 (3%)                                       | 1 (6%)                                 |                                      |
| <b>Theme 2: System Design</b>                             |                                              |                                        |                                      |
| <b>2.1. Quality of care</b>                               |                                              |                                        |                                      |
| • Quality of services                                     | 10 (36%)                                     | 1 (6%)                                 | 8 (80%)                              |
| • Knowledge acquisition                                   | 8 (28%)                                      |                                        | 8 (80%)                              |
| • Specialized therapy                                     | 6 (21%)                                      |                                        | 6 (60%)                              |
| • Healthcare services                                     | 5 (18%)                                      | 1 (6%)                                 | 3 (30%)                              |
| • Individualized focus                                    | 4 (14%)                                      |                                        | 4 (40%)                              |
| • Symptom management                                      | 2 (7%)                                       |                                        | 2 (20%)                              |
| <b>2.2. Information services</b>                          |                                              |                                        |                                      |
| • Information services                                    | 7 (25%)                                      |                                        | 7 (70%)                              |
| • Case management services                                | 5 (18%)                                      |                                        | 5 (50%)                              |
| • Navigate system                                         | 3 (11%)                                      |                                        | 3 (30%)                              |
| • Accountability                                          | 2 (7%)                                       |                                        | 2 (20%)                              |
| <b>2.3. Oriented teamwork approach</b>                    |                                              |                                        |                                      |
| • Quality of services                                     | 9 (32%)                                      |                                        | 9 (90%)                              |
| • Team-oriented                                           | 7 (25%)                                      |                                        | 7 (70%)                              |
| • Education to providers                                  | 4 (14%)                                      |                                        | 4 (40%)                              |
| • Overworked professionals                                | 2 (7%)                                       |                                        | 2 (20%)                              |
| <b>2.4. Self-management</b>                               |                                              |                                        |                                      |
| • Self-therapy                                            | 8 (28%)                                      |                                        | 8 (80%)                              |
| <b>Theme 3: Accessibility and system in the community</b> |                                              |                                        |                                      |
| • Policy                                                  | 11 (39%)                                     | 4 (23%)                                | 7 (70%)                              |
| • Accessibility design                                    | 10 (36%)                                     | 4 (23%)                                | 6 (60%)                              |
| • Recreational services                                   | 1 (3%)                                       |                                        | 1 (10%)                              |
| <b>Theme 4: Transportation services</b>                   |                                              |                                        |                                      |
| • Transport adapted services                              | 13 (46%)                                     | 8 (47%)                                | 4 (40%)                              |
| • Public transportation services                          | 10 (36%)                                     | 1 (6%)                                 | 9 (90%)                              |
| • Social norms                                            | 5 (18%)                                      |                                        | 5 (50%)                              |
| • Weather                                                 | 3 (11%)                                      | 3 (17%)                                |                                      |
| • Training                                                | 2 (7%)                                       |                                        | 2 (20%)                              |
| • Financial limitation                                    | 1 (3%)                                       | 1 (6%)                                 |                                      |
| <b>Theme 5: Uncertainty about the provided services</b>   |                                              |                                        |                                      |
| • Uncertainty                                             | 5 (18%)                                      |                                        | 5 (50%)                              |
